# Supplementary material for: Ultra-Rapid Vision in Birds
Source: PubMed Central journal article supplement (PMC4798572; doi:10.1371/journal.pone.0151099), 2016-03-18

Normalized quantum emission

1.00  
0.75  
0.50  
0.25  
0.00

300 400 500 600 700

Wavelength

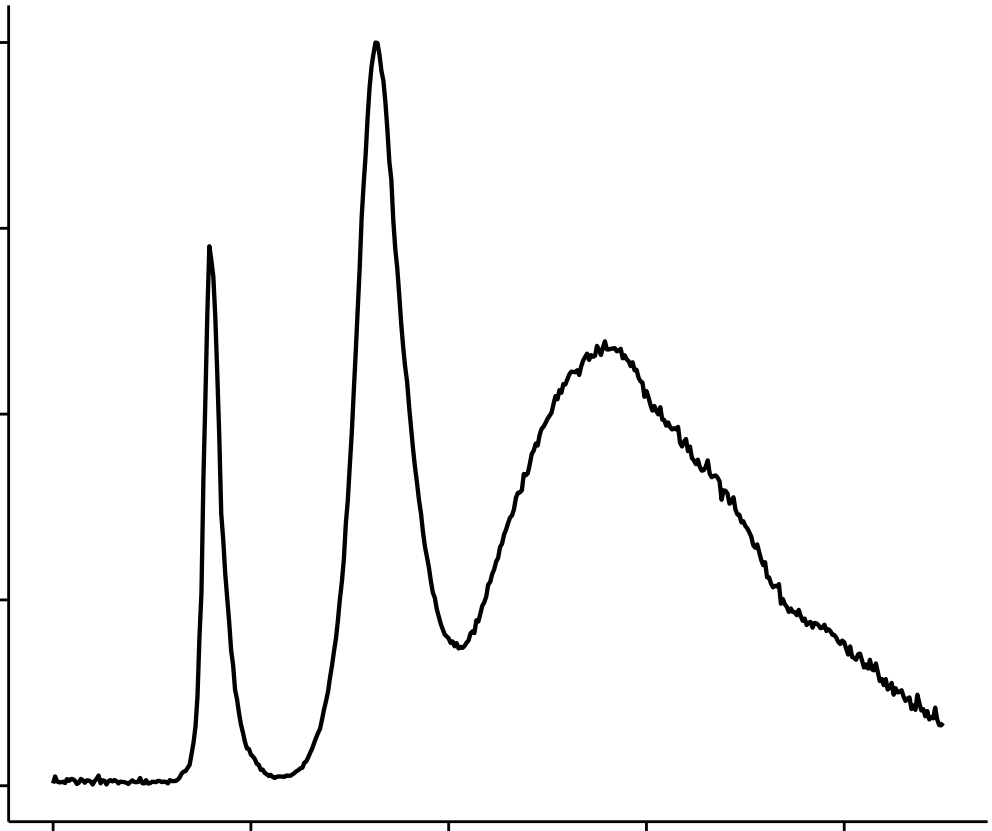

Supplement: pone.0151099.s001.pdf [file pone.0151099.s001.pdf]
